# Supplementary material for: Combined COX-2/PPARγ Expression as Independent Negative Prognosticator for Vulvar Cancer Patients
Source: PubMed Central journal article supplement (PMC8001561; doi:10.3390/diagnostics11030491), 2021-03-10
Supplement: diagnostics-11-00491-s001.pdf [file diagnostics-11-00491-s001.pdf]

**COX-2 in non- malignant tissue of vulva**

**S1**

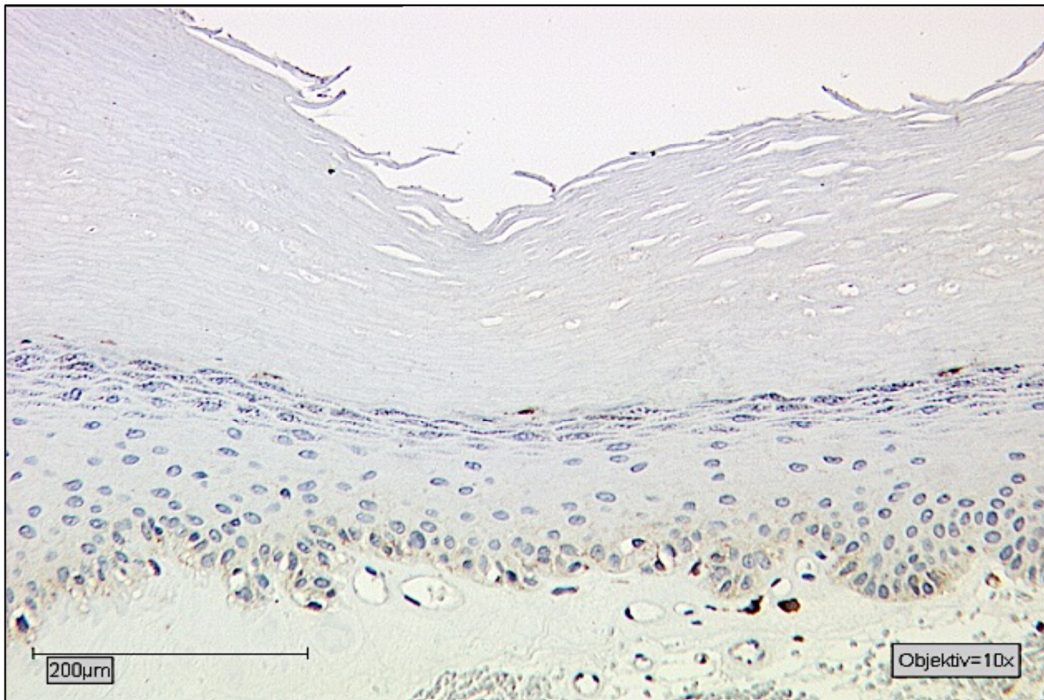

**Figure S1**  
Immunohistochemistry staining of COX-2 (10× magnification) showing staining behavior in non-malignant vulvar tissue of patient without vulvar cancer manifestation.

**PPAR $\gamma$  in non- malignant tissue of vulva**

**S2**

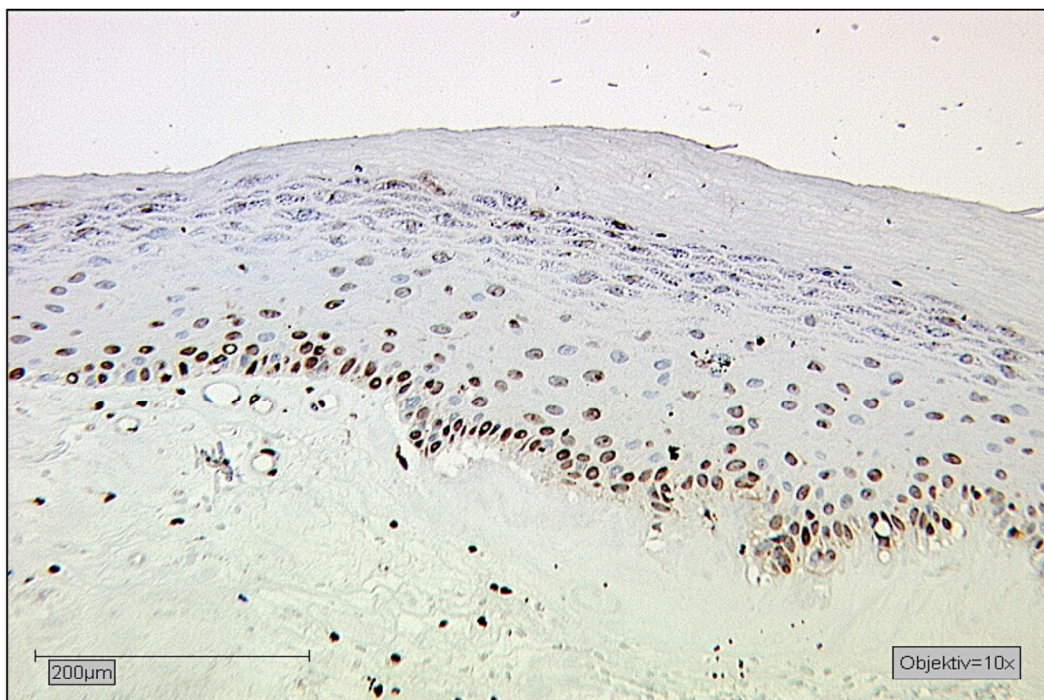

**Figure S2**  
Immunohistochemistry staining of PPAR $\gamma$  (10× magnification) showing staining behavior in non-malignant vulvar tissue of patient without vulvar cancer manifestation.
